# Supplementary material for: Clinical Outcomes of Ceftriaxone-Based De-escalation Therapy for Invasive Klebsiella pneumoniae Liver Abscess
Source: Research Square preprint supplement (doi:10.21203/rs.3.rs-8433906/v1), 2026-01-19
Supplement: Supplementary file 1 [file bddbd083d9eb7eca54bff4ec.xlsx]

## Sheet: Sheet1
Table S1. Antibiotic resistance of 260 cases of Klebsiella pneumoniae
Antibiotics	Ampicillin	Ceftetan	Ceftriaxone	Ceftazidime	Cefzolin	Ampicillin	Ampicillin/Sulbactam	Piperacillin/tazobactam	Cefoperazone/Sulbactam	Ertapenem	Imipenem	Amikacin	Gentamicin	Tobramycin	Levofloxacin	Ciprofloxacin	Compound sulfamine	Nitrofurantoin	ESBL
Drug resistance	260	0	3	1	7	1	11	1	0	0	0	0	0	1	4	4	9	4	2
Intermediary	0	0	0	0	0	1	18	2	0	0	0	0	0	0	14	14	0	4	/
Sensitive	0	260	257	259	253	258	231	257	260	260	260	260	260	259	242	242	251	252	258
